# Supplementary material for: Comparing Characteristics and Outcomes in Admissions with Pulmonary Embolism and Inflammatory Bowel Disease: A National Cohort Study
Source: Research Square preprint supplement (doi:10.21203/rs.3.rs-6909055/v1), 2025-07-10
Supplement: Supplementary file 1 [file 6bebf3e5b0bd82fc00fa093b.docx]

**Table 1. Baseline and in-hospital characteristics of pulmonary embolism admissions with and without inflammatory bowel disease**

| **Baseline Characteristics** | **IBD**  **(N=9,758)** | **No IBD**  **(N=1,086,631)** | ***P*** |
| --- | --- | --- | --- |
| Mean Age | 59.7 ± 0.36 | 63.1 ± 0.04 | <0.001 |
| Race | | | |
| - *White* | 80.59% | 68.83% | <0.001 |
| - *Black* | 11.0% | 19.05% | <0.001 |
| - *Hispanic* | 3.01% | 5.80% | <0.001 |
| - *Asian* | 0.51% | 01.02% | <0.05 |
| - *Native American* | 0.31% | 0.39% | 0.5431 |
| - *Others* | 1.69% | 2.07% | 0.2298 |
| Females | 54.24% | 51.64% | <0.05 |
| Elixhauser Index | 4.26 | 4.38 | <0.001 |
| Household income national quartile | | | <0.001 |
| - *0-25th* | 22.31% | 28.54% |
| - *25-50th* | 26.76% | 26.43% |
| - *50-75th* | 25.62% | 24.68% |
| - *75-100th* | 25.31% | 20.35% |
| Primary payer | | | <0.001 |
| - *Medicare* | 48.37% | 52.16% |
| - *Medicaid* | 12.28% | 10.27% |
| - *Private* | 36.57% | 28.55% |
| - *Self-pay* | 2.40% | 4.04% |
| - *No Charge* | 0.10% | 0.31% |
| - *Other* | 2.30% | 2.67% |
| Hospital region | | | <0.001 |
| - *Northeast* | 20.94% | 18.35% |
| - *Midwest* | 26.76% | 24.92% |
| - *South* | 34.78% | 38.78% |
| - *West* | 17.52% | 17.96% |
| Hospital size | | | 0.8961 |
| - *Small* | 21.81% | 21.69% |
| - *Medium* | 28.86% | 29.35% |
| - *Large* | 49.34% | 48.96% |
| Hospital Location/Teaching Status | | | 0.001 |
| - *Rural* | 7.10% | 8.90% |
| - *Urban Non-teaching* | 19.46% | 21.37% |
| - *Urban teaching* | 73.44% | 69.72% |
| Prior or current smoking history | 29.67% | 26.16% | <0.001 |
| History of venous thromboembolism | 38.07% | 34.02% | <0.001 |
| Acute organ failure and complications | | | |
| - *Renal failure* | 12.67% | 14.36% | <0.05 |
| - *Respiratory failure* | 25.43% | 27.89% | <0.05 |
| - *Hepatic failure* | 0.87% | 1.04% | 0.4637 |
| - *Hematologic failure* | 6.38% | 6.67 % | 0.6193 |
| - *Neurologic failure* | 3.22% | 4.59% | <0.05 |
| Intracranial hemorrhage | 0.00% | 0.47% | 0.1531 |
| Bleeding complications | 8.32% | 6.09% | < 0.001 |
| Cardiogenic Shock | 1.17% | 1.41% | 0.4097 |
| Vascular Complications | 0.00% | 0.035 | 0.4310 |
| In-Hospital Cardiac Arrest | 1.04% | 1.4% | 0.21 |
| Out-of-Hospital Cardiac Arrest | 1.02% | 1.89% | <0.05 |
| Non-cardiovascular organ support | | | |
| - *Non-invasive ventilation* | 2.15% | 2.87% | <0.0529 |
| - *Invasive ventilation* | 2.15% | 3.34% | <0.05 |
| - *Hemodialysis* | 1.02% | 0.85% | 0.4231 |
| Vasopressor use | 0.82% | 0.91% | 0.6778 |
| Pulmonary emboli procedures | | | |
| - Catheter directed thrombectomy | 3.4% | 3.5% | 0.6889 |
| - Systemic thrombolysis | 2.9% | 3.1% | 0.6684 |
| - Mechanical thrombectomy | 2.0% | 2.1% | 0.9816 |
| - Surgical embolectomy | 0.2% | 0.2% | 0.9150 |

**Represented as:** N(%); Percentage or mean ± standard deviation

**Table 2. Outcomes of pulmonary embolism admissions in patients with and without inflammatory bowel disease**

| **Outcomes** | **IBD**  **(N=9,758)** | **No IBD**  **(N=1,086,631)** | ***P*** |
| --- | --- | --- | --- |
| In-hospital mortality | 2.60% | 3.16% | 0.1720 |
| Discharge disposition | | | |
| - *Home (self-care)* | 67.77% | 64.56% | 0.056 |
| - *Short-term hospital* | 2.09% | 2.12% |
| - *Skilled nursing facility* | 11.44% | 13.44% |
| - *Home health care* | 14.96% | 15.81% |
| - AMA | 1.12% | 0.92% | 0.056 |
| - Died | 2.60% | 3.16% | 0.056 |
| Length of stay in days | 4.37 | 4.34 | 0.332 |
| Total hospital charges (United States Dollars) | 53136.64 | 51796.01 | <0.001 |

**Represented as:** N(%); Percentage or mean ± standard deviation

**Table 3. Multivariate regression analysis for in-hospital mortality**

| **Variables** | **Univariable Analysis** | | **Multivariable Analysis** | |
| --- | --- | --- | --- | --- |
| **Odds Ratio (95% CI)** | ***P*** | **Odds Ratio (95% CI)** | ***P*** |
| Mean age | 1.02 (1.02-1.03) | <0.001 | 1.03 (1.03-1.03) | <0.001 |
| Female | 1.07(1.02-1.12) | 0.011 | 1.04 (0.97-1.12) | 0.291 |
| Race |  | | | |
| - *White* | 0.84 (0.80-0.88) | <0.001 | 0.88 (0.76-1.02) | 0.097 |
| - *Black* | 1.06 (1.0-1.12) | 0.071 | 0.74 (0.62-0.88) | 0.001 |
| - *Hispanic* | 1.13 (1.02-1.25) | 0.017 | 0.93 (0.75-1.14) | 0.471 |
| - *Asian* | 1.71 (1.41-2.07) | <0.001 | 1.42 (1.02-1.97) | 0.039 |
| - *Native* | 1.07 (0.71-1.62) | 0.731 |  |  |
| Elixhauser Comorbidity Index | 1.38 (1.37-1.40) | <0.001 | 1.09 (1.07-1.11) | <0.001 |
| Median Household Income for zip code |  | | | |
| - *0-25th percentile* | **Reference Category** | | | |
| - *26th to 50th percentile* | 0.93 (0.87- 0.99) | 0.022 | 0.96(0.87-1.06) | 0.441 |
| - *51st to 75th percentile* | 0.91 (0.85-0.97) | 0.005 | 0.95 (0.86-1.06) | 0.344 |
| - *76th to 100th percentile* | 0.91 (0.85-0.98) | <0.001 | 0.98 (0.87-1.10) | 0.706 |
| Primary Payer |  | | | |
| - *Medicare* | **Reference Category** | | | |
| - *Medicaid* | 0.63 (0.58-0.69) | <0.001 |  |  |
| - *Private insurance* | 0.60 (0.56-0.64) | <0.001 |  |  |
| - *Self-pay* | 0.80 (0.71-0.91) | <0.001 |  |  |
| - *No Charge* | 0.34 (0.18-0.66) | 0.001 |  |  |
| - *Other* | 0.80 (0.68-0.93) | 0.004 |  |  |
| Hospital Size |  | | | |
| - *Small* | **Reference Category** | | | |
| - *Medium* | 1.24 (1.15-1.34) | <0.001 |  |  |
| - *Large* | 1.53 (1.43-1.64) | <0.001 |  |  |
| Hospital Region |  | | | |
| - *Northeast* | **Reference Category** | | | |
| - *Midwest* | 0.93(0.86-1.01) | 0.074 |  |  |
| - *South* | 1.03 (0.96-1.10) | 0.458 |  |  |
| - *West* | 1.09 (1.01-1.19) | 0.029 |  |  |
| Hospital Location/Teaching Status |  | | | |
| - *Rural* | **Reference Category** | | | |
| - *Urban nonteaching* | 1.03 (0.92-1.15) | 0.578 | 0.83 (0.71-0.97) | 0.019 |
| - *Urban teaching* | 1.48(1.34-1.64) | <0.001 | 1.04 (0.90-1.19) | 0.606 |
| Acute organ failure and complications | | | | |
| - *Respiratory Failure* | 9.94 (9.38-10.54) | <0.001 | 3.02 (2.78-3.28) | <0.001 |
| - *Renal Failure* | 6.09 (5.80-6.40) | <0.001 | 1.66 (1.52- 1.81) | <0.001 |
| - *Hepatic Failure* | 22.67 (20.75-24.77) | <0.001 | 0.84 (0.67-1.06) | 0.142 |
| - *Hematological Failure* | 3.77 (3.54- 4.01) | <0.001 | 1.37 (1.21-1.55) | <0.001 |
| - *Neurological Failure* | 12.18 (11.52-12.87) | <0.001 | 1.63 (1.45-1.84) | <0.001 |
| Intracranial Hemorrhage | 9.41 (8.13-10.89) | <0.001 | 3.43 (2.53- 4.63) | <0.001 |
| Stroke | 8.38 (7.33- 9.59) | <0.001 | 1.54 (1.14- 2.08) | 0.005 |
| Bleeding Complications | 2.75 (2.56- 2.95) | <0.001 | 0.73 (0.62- 0.85) | <0.001 |
| Cardiogenic Shock | 22.62 (20.73- 24.67) | <0.001 | 2.30 (1.93- 2.73) | <0.001 |
| Vascular Complications | 4.26 (2.13- 8.52) | <0.001 | 0.05 (0.02- 0.16) | <0.001 |
| In-Hospital Cardiac Arrest | 114.62 (104.40-125.83) | <0.001 | 6.48 (5.22-8.05) | <0.001 |
| Out-of-Hospital Cardiac History | 89.73 (83.60- 96.31) | <0.001 | 7.62 (6.49- 8.95) | <0.001 |
| Non-cardiovascular organ support | | | | |
| - *Invasive Mechanical Ventilation* | 67.63 (63.85-71.63) | <0.001 | 7.28 (6.42- 8.25) | <0.001 |
| - *Non-invasive Mechanical Ventilation* | 4.24 (3.90-4.61) | <0.001 | 2.44 (2.13- 2.78) | <0.001 |
| - *Hemodialysis* | 5.80 (5.09- 6.60) | <0.001 | 0.83 (0.68-1.17) | 0.292 |

**Table 3**. P<0.05 indicates statistical significance.
